# Supplementary material for: Regular assembly of 9-fluorenone-2,7-dicarboxylate within layered double hydroxide and its solid-state photoluminescence: a combined experiment and computational study
Source: Royal Society of Chemistry journal article supplement (doi:10.1039/c3ra23064c), 2013-01-01
Supplement: c3ra23064c.pdf [file c3ra23064c.pdf]

# Supplementary Information for

## Regular Assembly of Fluorenone-2,7-dicarboxylate within Layered Double Hydroxide and its Solid-state Photoluminescence: A Combined Experiment and Computational Study

Dongpeng Yan,<sup>\*a</sup> Yibing Zhao,<sup>a</sup> Min Wei,<sup>a</sup> Ruizheng Liang,<sup>a</sup> Jun Lu,<sup>a</sup> David G. Evans,<sup>a</sup> and Xue Duan<sup>a</sup>

a State Key Laboratory of Chemical Resource Engineering, Beijing University of Chemical Technology, Beijing 100029, P. R. China.

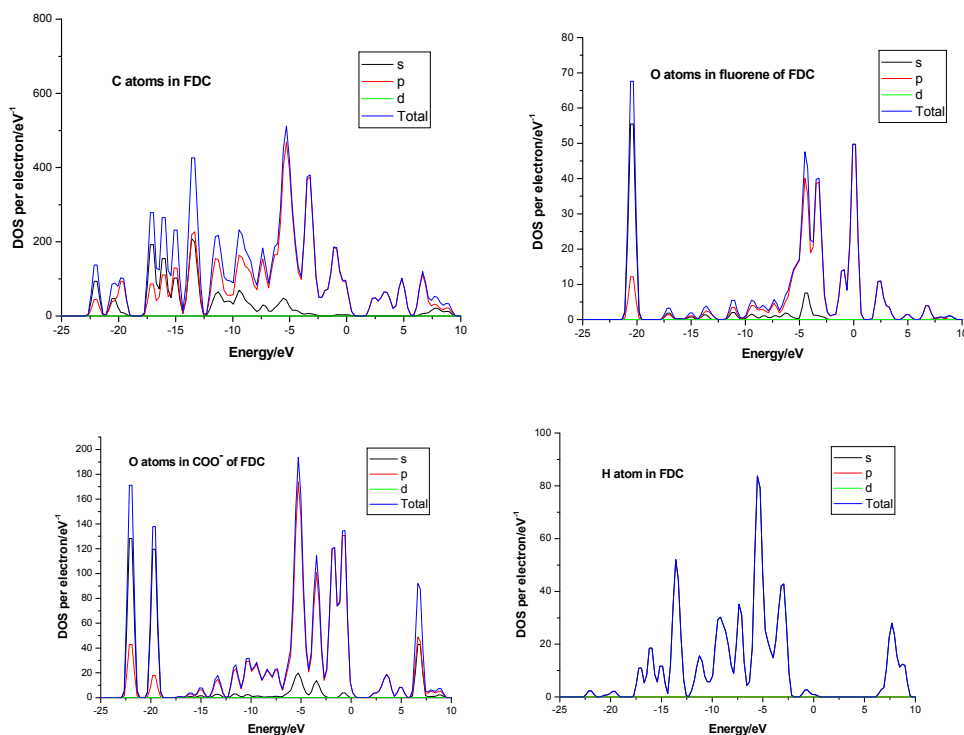

**Figure S1.** Total and partial electronic density of states (TDOS and PDOS) profiles for different atoms in pristine FDC.

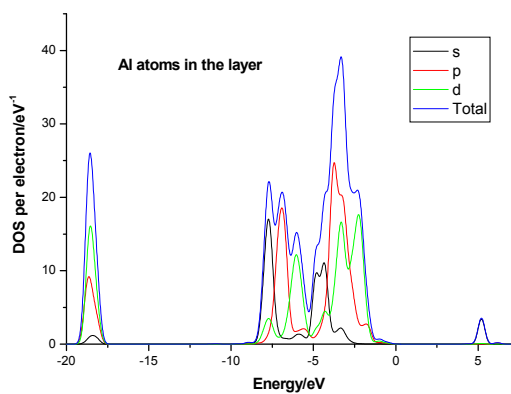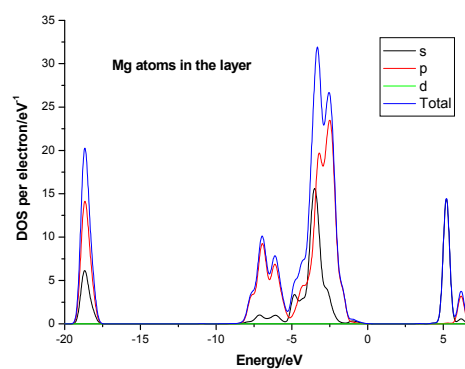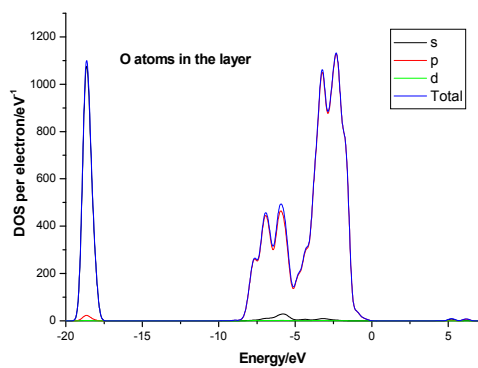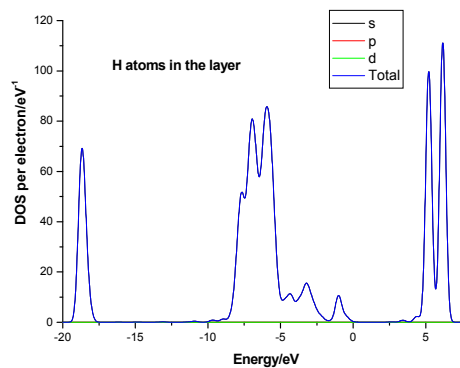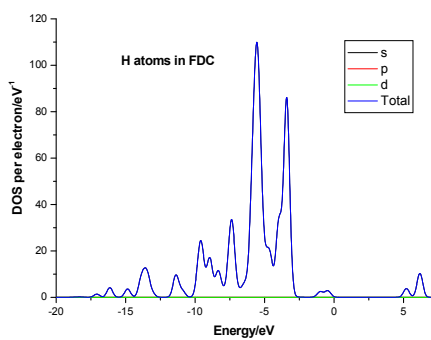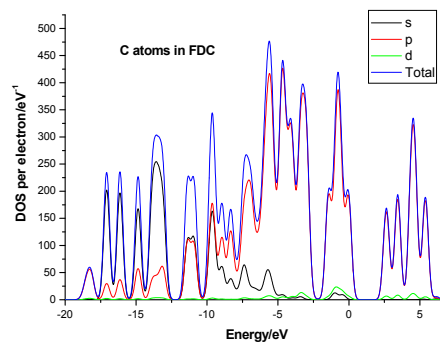

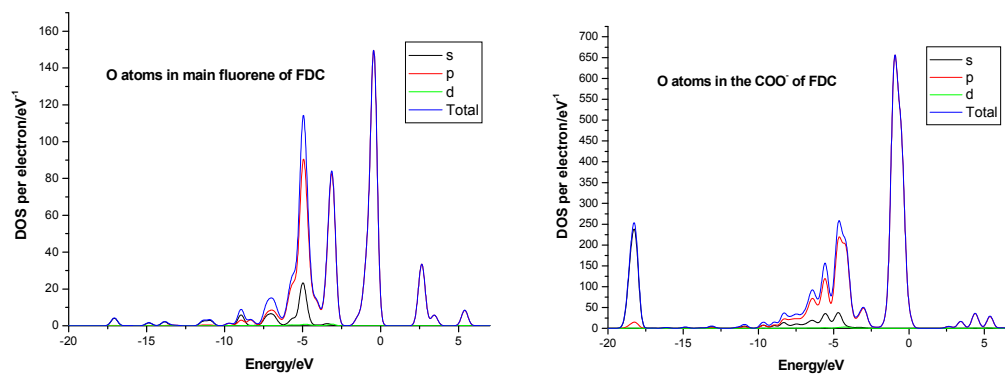

**Figure S2.** Total and partial electronic density of states (TDOS and PDOS) profiles for different atoms in FDC/Mg<sub>2</sub>Al-LDH system.

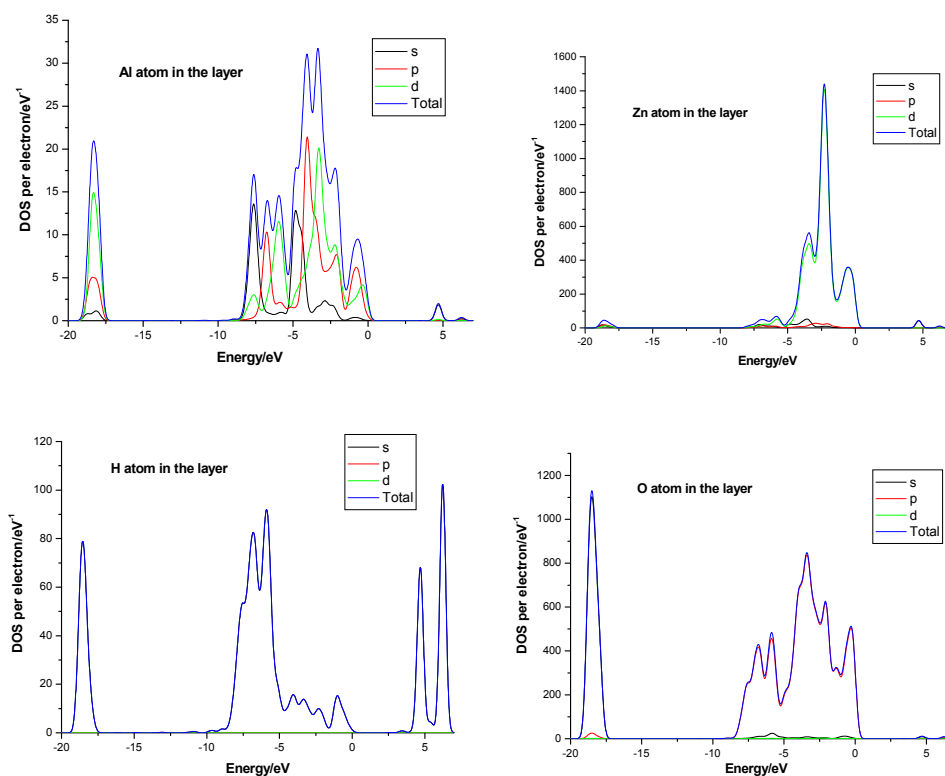

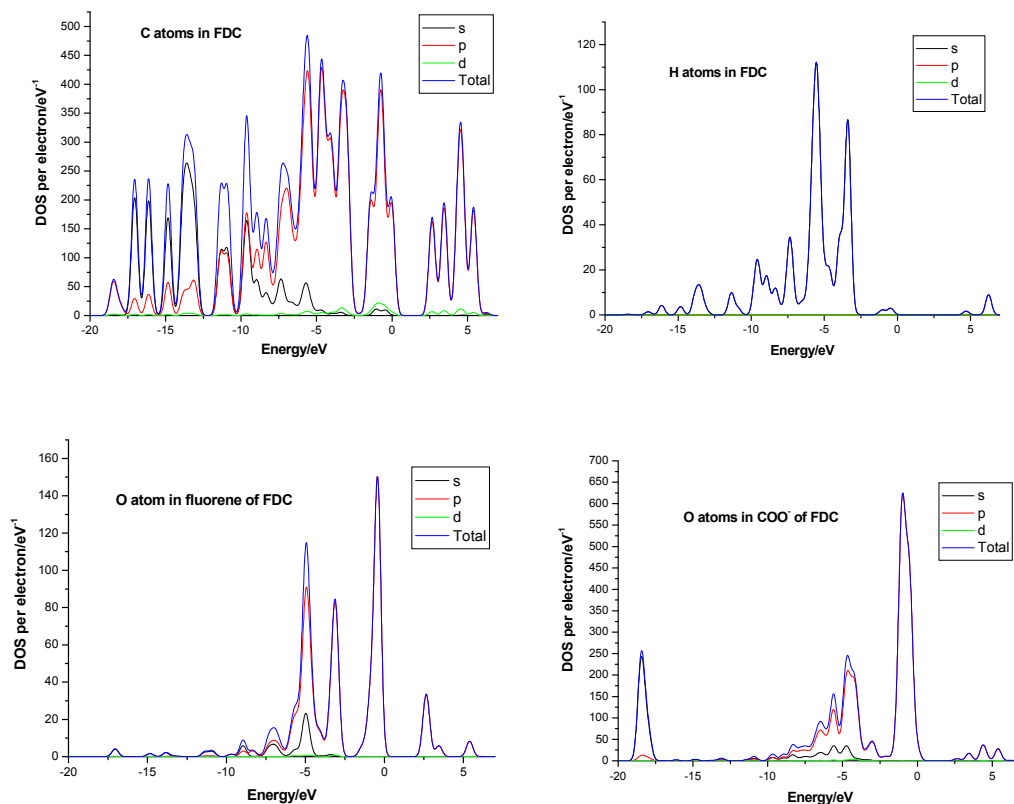

**Figure S3.** Total and partial electronic density of states (TDOS and PDOS) profiles for different atoms in FDC/ $\text{Zn}_2\text{Al-LDH}$  system.
